# Supplementary material for: Enhanced Expression of microRNA-1273g-3p Contributes to Alzheimer’s Disease Pathogenesis by Regulating the Expression of Mitochondrial Genes
Source: Cells. 2021 Oct 9;10(10):2697. doi: 10.3390/cells10102697 (PMC8534383; doi:10.3390/cells10102697)
Supplement: Supplementary file 1 [file cells-10-02697-s001.zip › Supplementary tables.xlsx]

## Sheet: Table S1
Supplementary table S1. Raw data of microarray
Control vs AD
Transcript ID(Array Design)	Log2Ratio	Absolute Fold Change	P-value	Avg(N)	Avg(AD)	NM1	NM2	NM3	NM4	NF1	NF2	NF3	NF4	NF5	AD-M1	AD-M2	AD-M3	AD-M4	AD-M5	AD-F1	AD-F2	AD-F3	AD-F4
hsa-miR-1273g-3p	0.919358	1.89127	0.0227098	2.04037	2.95973	1.69096	1.18686	1.26965	1.51705	3.67902	1.32515	1.97357	1.25818	2.20476	2.93418	3.20431	3.88815	1.348	2.05655	1.75201	3.45421	3.1609	3.06584
hsa-miR-8063	0.637171	1.55528	0.00420864	1.61444	2.25162	1.54446	2.03953	1.29983	1.20444	1.8156	1.76183	1.5004	1.5543	1.62548	3.15403	1.87658	2.6652	2.11	1.66564	1.99462	2.22302	1.88302	2.03953
hsa-miR-6798-3p	-0.596929	1.51249	0.00749035	1.85945	1.26252	1.5628	2.47991	1.78933	2.60331	1.30855	1.67226	1.89994	1.47616	1.27131	1.22014	1.55217	1.68831	1.13646	1.1207	1.09483	1.22835	0.960155	1.20782
hsa-miR-106b-5p	-0.66053	1.58066	0.0232939	5.15144	4.49091	5.67376	5.29561	4.97952	4.40603	5.19903	5.22936	5.44532	5.1282	4.58552	4.51296	4.83748	4.55192	2.56855	3.16734	4.82141	4.82559	5.22906	4.20452
hsa-miR-363-3p	-0.69447	1.61829	0.0319597	2.89741	2.20294	3.36038	1.98755	1.9698	2.57037	3.09545	2.7109	3.77879	3.07671	2.51311	1.46386	2.81846	1.85979	0.923006	2.04762	1.4793	3.22157	2.82792	1.45866
Control vs aMCI
Transcript ID(Array Design)	Log2Ratio	Absolute Fold Change	P-value	Avg(N)	Avg(aMCI)	NM1	NM2	NM3	NM4	NF1	NF2	NF3	NF4	NF5	aMCI-M1	aMCI-M2	aMCI-M3	aMCI-F3	aMCI-F4	aMCI-F5
hsa-miR-1273g-3p	1.18801	2.27839	0.0122633	2.04037	3.22839	1.69096	1.18686	1.26965	1.51705	3.67902	1.32515	1.97357	1.25818	2.20476	3.76077	3.45267	2.77078	1.48824	3.82149	2.99302
hsa-miR-6875-5p	1.09776	2.14022	0.0197739	1.70601	2.80377	1.46034	1.44693	1.81363	2.07901	2.36535	0.94797	2.26268	0.895117	1.26559	3.99411	1.93125	2.3856	2.96868	2.63451	1.52793
hsa-miR-4433b-3p	0.855342	1.80919	0.0267379	3.67914	4.53448	4.07444	2.8686	2.45041	3.66844	4.51245	3.99669	3.95767	2.76149	3.56668	4.87365	4.94393	5.06846	4.2499	3.5189	3.89799
hsa-miR-501-3p	0.785784	1.72403	0.0105067	1.63299	2.41878	1.45242	1.76298	1.39531	1.2879	1.91097	0.904883	2.01955	1.21806	2.23183	2.87008	2.92347	1.66564	2.30221	2.54508	1.69788
hsa-miR-1233-5p	0.756391	1.68926	0.0399372	2.69398	3.45037	2.89363	2.28911	2.19951	1.31179	3.43497	1.95021	3.81108	2.04474	2.58557	3.9096	2.88872	3.71218	2.6182	3.9855	3.01195
hsa-miR-652-3p	0.649727	1.56887	0.0417629	3.84621	4.49593	4.19657	4.35589	2.70868	3.773	4.13443	3.52409	4.11559	3.584	3.58809	4.85198	4.4813	4.24224	3.35176	4.95588	4.58474
hsa-miR-375	0.643937	1.56259	0.0382083	1.21888	1.86282	1.24556	1.41569	0.841753	1.07707	1.05861	1.13288	1.30937	1.81758	0.789864	2.54255	1.29482	2.16717	0.940101	2.18746	1.36644
hsa-miR-4640-5p	0.616418	1.53306	0.0287614	4.11515	4.73156	3.50042	3.19667	3.68674	4.6412	4.30458	2.9765	5.09944	3.85613	4.40947	4.62854	4.75751	4.42035	4.87069	5.14048	4.43801
hsa-miR-6777-5p	0.588044	1.50321	0.0039076	1.35802	1.94607	1.47728	0.80447	1.29983	1.49077	1.96987	1.43892	0.941373	1.14667	1.32426	1.80348	1.43577	2.30739	2.01656	1.86319	2.10075
hsa-miR-6798-3p	-0.618391	1.53516	0.0195125	1.85945	1.24106	1.5628	2.47991	1.78933	2.60331	1.30855	1.67226	1.89994	1.47616	1.27131	1.23588	1.11543	1.36486	1.16575	0.923196	1.55832
aMCI, amnestic mild cognitive impairment; AD, Alzheimer’s disease; Avg, average

## Sheet: Table S2
Supplementary table S2. Ct values of qPCR analysis of plasma miRNAs
Experiment #	1st							2nd							3rd							4th
Diagnosis	miR-1273g-3p	miR-23a-3p	miR-191-3p	miR-425-5p	miR-451a	average Ct of controls	2-dCt	miR-1273g-3p	miR-23a-3p	miR-191-3p	miR-425-5p	miR-451a	average Ct of controls	2-dCt	miR-1273g-3p	miR-23a-3p	miR-191-3p	miR-425-5p	miR-451a	average Ct of controls	2-dCt	miR-1273g-3p	miR-23a-3p	miR-191-3p	miR-425-5p	miR-451a	average Ct of controls	2-dCt	average 2-dCt
Control 1	29.21	26.45	27.395	29.11	18.665	25.405	0.0715453	29.37	26.4733	27.36	28.9467	18.5733	25.3383	0.0611431															0.0663442
Control 2	27.6033	24.3567	27.1067	28.6367	19.12	24.805	0.143753	28.88	26.405	28.625	29.995	20.185	26.3025	0.167531	29.1867	26.5367	28.9	30.8367	20.8	26.7683	0.187072								0.166119
Control 3	26.4533	23.84	24.98	25.9833	16.1633	22.7417	0.0763268	25.12	23.78	24.74	25.855	16.2	22.6438	0.179711															0.128019
Control 4	27.5367	24.77	26.5167	27.39	17.7567	24.1083	0.09289	26.035	24.34	25.695	26.95	17.66	23.6612	0.192943	28.38	26.545	27.805	29.57	19.625	25.8863	0.177544	28.5467	26.3233	27.6267	29.6233	19.6067	25.795	0.148479	0.152964
Control 5	27.5567	24.8067	26.1233	27.8167	18.07	24.2042	0.0979032	29.07	26.48	27.145	28.545	18.295	25.1163	0.0645361	29.4067	26.44	27.3167	28.6233	18.4867	25.2167	0.0547879								0.0724091
Control 6	27.1067	24.7067	25.9333	26.4567	16.83	23.4817	0.0810525	26.105	24.615	25.37	26.375	16.835	23.2987	0.142967															0.11201
Control 7	28.725	25.8	27.545	29.125	19.695	25.5412	0.110051	28.4067	25.7967	27.4333	29.04	19.5733	25.4608	0.129782															0.119917
Control 8	28.7967	24.5933	27.6367	29.7933	20.2967	25.58	0.107569	28.145	24.855	27.545	28.52	18.945	24.9663	0.110434	28.6167	24.73	27.64	28.4333	18.8233	24.9067	0.076415								0.0981392
Control 9	28.295	25.595	26.895	28.86	19.135	25.1212	0.110817	28.1433	25.64	26.9233	29.2567	19.6533	25.3683	0.146097															0.128457
Control 10	27.0467	23.95	25.6033	26.8533	17.6	23.5017	0.0856739	25.375	23.815	25.155	26.465	17.475	23.2275	0.225703															0.155689
Control 11	27.4867	24.6167	25.9667	26.6033	16.74	23.4817	0.0622838	26.25	24.635	25.51	26.5	16.975	23.405	0.139178	29.52	26.555	27.22	28.72	18.62	25.2788	0.0528757	29.07	26.3567	27.2333	28.7467	18.6867	25.2558	0.0710921	0.0813573
Control 12	27.56	24.6167	26.2967	27.3433	17.26	23.8792	0.0779756	26.14	24.31	25.095	25.895	16.415	22.9288	0.107974															0.0929746
Control 13	26.69	23.9767	26.01	26.2167	16.5533	23.1892	0.0883373	25.185	23.53	25.205	26.245	16.64	22.905	0.205898															0.147118
Control 14	27.0133	24.22	26.3667	26.84	17.1133	23.635	0.0961657	25.885	24.18	25.86	27.06	17.2	23.575	0.20166	28.985	26.445	28.18	29.52	18.935	25.77	0.107693	29.5167	27.5633	29.4467	30.31	19.82	26.785	0.150552	0.139018
Control 15	26.55	24.26	25.64	25.89	16.12	22.9775	0.0840563	26.17	24.58	25.905	26.325	16.91	23.43	0.149685	28.75	26.52	27.17	28.185	18.005	24.97	0.0727958	28.77	26.5133	27.6467	28.3433	18.0733	25.1442	0.0810057	0.0968857
Control 16	28.09	24.8667	26.2633	27.2233	17.7	24.0133	0.0592654	26.075	24.41	25.545	26.045	16.69	23.1725	0.13374															0.0965026
Control 17	27.2333	24.6333	26.5867	27.4833	17.6233	24.0817	0.112526	25.845	24.3	25.855	26.855	17.03	23.51	0.198196	29.27	26.84	28.06	29.98	19.635	26.1288	0.113342	29.22	26.5767	28.2833	29.7067	19.3167	25.9708	0.105173	0.132309
Control 18	28.825	26.42	27.825	29.395	19.07	25.6775	0.112852	28.7733	26.3767	27.76	29.36	18.9	25.5992	0.110785															0.111818
Control 19	26.95	24.5867	26.3867	26.8667	17.0833	23.7308	0.107383	26.635	24.65	26.25	26.76	17.125	23.6962	0.130421															0.118902
Control 20	28.76	25.67	27.8633	28.8267	19.07	25.3575	0.0945683	27.685	23.97	25.66	27.605	18.56	23.9488	0.0750372															0.0848027
Control 21	26.6567	24.51	26	27.6733	17.6967	23.97	0.155322	26.185	24.365	25.915	26.705	16.95	23.4838	0.15376	29.75	26.62	27.96	29.945	19.325	25.9625	0.0724184	29.2267	26.6067	27.88	29.6633	19.3833	25.8833	0.0985273	0.120007
Control 22	26.11	24.19	25.7233	27.0767	17.35	23.585	0.17374	25.13	23.77	25.38	26.05	16.4	22.9	0.213159	28.52	25.9	27.185	29.095	18.78	25.24	0.102949	28.1267	25.86	27.35	28.9967	18.8533	25.265	0.137579	0.156857
Control 23	27.4633	24.8667	26.8233	27.61	17.7733	24.2683	0.109197	27.36	24.81	26.715	29.315	18.58	24.855	0.176165	29.625	26.6	28.595	29.625	19.06	25.97	0.0793844	29.4433	27.1833	29.41	29.99	19.7267	26.5775	0.137182	0.125482
Control 24	26.2267	24.1633	25.57	26.5433	17.2233	23.375	0.138536	25.32	23.165	24.96	26.43	17.13	22.9213	0.189629															0.164082
Control 25	26.465	23.9967	25.92	26.8367	17.97	23.6808	0.145172	26.705	24.2	26.215	28.095	19.705	24.5538	0.225117															0.185145
Control 26	28.225	24.97	26.775	27.895	18.605	24.5613	0.0789044	27.66	24.45	26.33	27.48	18.1767	24.1092	0.0853282	26.76	23.87	25.895	27.025	17.64	23.6075	0.112461								0.0922313
Control 27	26.65	24.7867	26.13	26.81	17.7033	23.8575	0.144336	26.145	24.105	25.965	26.4	16.87	23.335	0.142595	29.6	26.475	27.98	29.28	19.26	25.7488	0.069288	28.9933	26.6233	27.9267	29.3333	19.4633	25.8367	0.112137	0.117089
Control 28	26.51	24.3033	25.8867	27.2133	17.4067	23.7025	0.142843	24.925	23.41	24.81	25.96	16.8	22.745	0.220676															0.181759
Control 29	27.94	24.9167	26.6033	26.69	17.33	23.885	0.0601622	26.68	24.505	25.74	26.645	17.205	23.5237	0.112169	30.05	26.86	27.775	28.975	19.105	25.6788	0.0483195	29.65	27.2233	28.09	29.3267	19.5667	26.0517	0.0825646	0.0758039
Control 30	27.1367	25.0167	25.54	26.6767	16.8333	23.5167	0.0813339	26.935	24.42	25.17	26.105	16.005	22.925	0.0620683															0.0717011
Control 31	26.37	24.6767	26.23	27.3	17.7733	23.995	0.192776	25.94	24.43	26.24	26.625	16.93	23.5562	0.191611															0.192194
PSAD 1	28.75	26.58	28.23	29.12	19.04	25.7425	0.124352	29.1567	26.6	27.9533	29.5967	19.2667	25.8542	0.101356															0.112854
PSAD 2	29.475	26.585	27.815	28.915	19.08	25.5987	0.0680977	28.8667	26.56	27.8233	28.8667	18.96	25.5525	0.100539															0.0843186
PSAD 3	27.17	24.15	25.8267	27.6467	18.0267	23.9125	0.104567	27.21	24.085	26.115	27.235	17.545	23.745	0.0905589	29.85	26.2	27.825	29.83	19.86	25.9288	0.0660064	28.6033	25.97	27.4867	29.4267	19.6467	25.6325	0.127553	0.0971713
PSAD 4	26.4133	23.8133	25.5433	25.8733	16.1367	22.8417	0.0841049	26.71	24.435	25.335	27.75	17.775	23.8238	0.135255	29.43	26.505	27.265	29.23	18.925	25.4812	0.0647601	28.5167	26.18	27.3833	28.9833	18.7467	25.3233	0.109323	0.0983606
PSAD 5	28.5	26.9	28.395	29.345	19.125	25.9413	0.169723	27.9933	26.6433	28.5633	29.24	19.0867	25.8833	0.231647															0.200685
PSAD 6	26.9267	24.5967	26.1133	27.1733	17.7567	23.91	0.123564	26.885	24.295	26.075	27.65	17.915	23.9838	0.133856	29.575	26.87	28.52	29.76	19.575	26.1813	0.0951436	29.4867	26.8733	28.4733	29.8467	19.6733	26.2167	0.103665	0.114057
PSAD 7	26.2733	24.07	25.6333	26.68	16.8533	23.3092	0.128144	27.155	23.99	25.8	27.22	17.425	23.6088	0.0855997	29.14	25.995	27.665	29.19	18.69	25.385	0.0740683	28.9	26.1933	27.6067	29.0567	18.9833	25.46	0.0921418	0.0949884
PSAD 8	26.4	23.9867	25.55	27.17	17.5833	23.5725	0.140876	25.94	23.805	25.335	26.645	16.81	23.1487	0.144461	29.035	25.98	26.93	29.075	18.845	25.2075	0.0704381	28.61	26.01	27.1833	29.04	18.8933	25.2817	0.099557	0.113833
PSAD 9	27.1333	24.2767	25.96	27	17.29	23.6317	0.0882863	27.27	24.225	25.785	27.42	17.445	23.7188	0.0853036	29.395	26.085	27.595	28.745	18.98	25.3513	0.0606331	28.8667	26.0933	27.5167	29.07	19.0567	25.4342	0.0926221	0.0817113
PSAD 10	27	24.26	25.9833	26.3433	16.7667	23.3383	0.0790184	26.595	24.055	25.96	26.685	16.775	23.3687	0.106857	29.215	26.365	27.685	28.84	18.625	25.3788	0.0700122	28.5333	26.0833	27.4633	28.4633	18.4033	25.1033	0.0927827	0.0871675
PSAD 11	26.1633	23.9533	25.6967	26.2167	16.69	23.1392	0.122924	26.785	24.045	25.665	27.01	17.11	23.4575	0.0996145	29.04	26.315	27.5	29.115	18.93	25.465	0.0839108	28.42	26.0233	27.3067	28.6433	18.8367	25.2025	0.107507	0.103489
PSAD 12	28.535	25.98	26.985	28.075	17.865	24.7263	0.0713595	27.83	25.7167	26.9967	27.8867	17.6667	24.5667	0.104145															0.0877523
PDAD 1	29.02	27.4	28.85	29.72	19.98	26.4875	0.172839	28.9167	26.81	28.1233	28.9833	19.3067	25.8058	0.115757															0.144298
PDAD 2	26.61	24.29	25.96	27.84	18.67	24.19	0.186856	27.3067	24.6467	26.63	27.3	17.4367	24.0033	0.101297	27.44	24.28	26.035	27.705	18.345	24.0912	0.098158								0.12877
PDAD 3	26.2333	24.1167	25.74	26.2067	16.32	23.0958	0.113637	26.855	24.325	26	27.91	17.945	24.045	0.142595	29.26	26.23	27.385	28.885	18.485	25.2462	0.0619072	29.3433	26.2367	27.51	28.92	18.67	25.3342	0.0621041	0.0950609
PDAD 4	26.9033	24.5533	25.4867	27.03	18.01	23.77	0.113965	27.35	24.05	24.925	26.715	17.925	23.4037	0.0648725															0.0894189
PDAD 5	26.4633	24.23	26.3633	26.6533	16.8533	23.525	0.130459	27.58	24.445	26.295	27.64	17.63	24.0025	0.0837655	28.95	26.495	27.995	29.245	19.01	25.6862	0.104115	28.7967	26.1767	28.0233	28.9567	18.8167	25.4933	0.101297	0.104909
PDAD 6	28.835	26.26	27.575	28.985	18.535	25.3387	0.0886184	28.7033	26.03	27.2567	28.7467	18.3567	25.0975	0.0821365															0.0853774
PDAD 7	25.06	23.69	24.9833	25.8433	15.9967	22.6283	0.185351	25.585	23.69	25.21	25.885	16.465	22.8125	0.146351	28.885	25.825	26.875	28.42	18.09	24.8025	0.0590262	28.68	25.9033	27.02	28.5	18.1567	24.895	0.072544	0.115818
PDAD 8	29.895	26.925	28.785	30.25	20.4	26.59	0.10118	29.9367	27.0633	29.17	30.7	20.7167	26.9125	0.122924															0.112052
PDAD 9	28.835	25.98	28.035	29.41	19.45	25.7188	0.115323	28.78	25.85	27.8533	29.7233	19.3	25.6817	0.116764															0.116043
PDAD 10	25.1733	24.36	26.6333	27.41	17.6033	24.0017	0.443908	26.395	24.58	26.63	28.08	18.425	24.4287	0.255917	29.4	26.565	28.425	29.87	19.69	26.1375	0.104205	29.5767	26.5133	28.2767	30.3567	19.9533	26.275	0.101414	0.226361
PDAD 11	29.33	25.92	27.7	29.8	20.27	25.9225	0.0942411	26.72	24.15	26.3	28.7	18.99	24.535	0.219912	27.56	24.5667	26.85	27.3	17.9733	24.1725	0.0955566								0.13657
PDAD 12	28.98	26.1	26.58	28.73	18.44	24.9625	0.0617464	26.42	24.46	25.62	27.16	17.16	23.6	0.14161	27.27	24.48	25.89	26.5033	16.4367	23.3275	0.0650413	25.46	24.13	25.28	25.94	16.015	22.8412	0.162809	0.107802
PDAD 13	27.3233	24.6467	26.37	26.7867	16.84	23.6608	0.0789728	25.78	24.71	26.155	27.18	17.035	23.77	0.248273	29.61	26.745	27.765	29.125	18.795	25.6075	0.0623918	29.0267	26.7433	27.6233	29.26	18.8533	25.62	0.0942955	0.120983
PDAD 14	26.6333	23.92	25.6667	26.9267	17.2	23.4283	0.108442	25.27	23.605	25.3	27.265	17.15	23.33	0.260616	28.955	25.91	27.04	29.39	19.145	25.3712	0.0834034	28.6733	26.0267	26.86	29.5933	19.1933	25.4183	0.104748	0.139303
PDAD 15	29.66	26.305	27.525	29.33	19.03	25.5475	0.0578115	29.41	26.67	27.74	29.8433	19.6	25.9633	0.091717															0.0747643
PDAD 16	27.35	24.97	26.02	27.1133	17.29	23.8483	0.0882863	26.455	24.25	25.555	27.415	17.05	23.5675	0.135138	29.685	27.01	27.7	29.51	18.96	25.795	0.0674518	30.0233	27.0533	27.7	29.6133	19.0233	25.8475	0.0553285	0.086551
PDAD 17	29.415	26.43	26.23	28	17.36	24.505	0.0332616	29.34	26.23	26.09	27.6	17.1033	24.2558	0.029479															0.0313703
PDAD 18	27.6733	25.0033	26.0667	28.2933	18.1667	24.3825	0.102179	26.42	24.66	25.645	26.68	16.905	23.4725	0.129633	28.94	27.045	27.4	29.375	18.935	25.6887	0.105021	28.5367	26.8933	27.5367	29.1867	19.02	25.6592	0.136077	0.118227
PDAD 19	27.01	24.26	26.5367	27.5933	17.8933	24.0708	0.130384	25.775	23.935	26.18	27.895	17.89	23.975	0.287175	29.235	26.41	28.065	30.195	20.095	26.1912	0.121266	29.1767	26.2567	28.13	30.0333	19.7933	26.0533	0.114758	0.163396
PDAD 20	29.955	26.76	28.465	30.475	19.97	26.4175	0.0861205	30.1367	26.7733	28.48	30.5667	20.1167	26.4842	0.0795221															0.0828213
AD 1	26.9833	24.94	26.3967	27.81	18.51	24.4142	0.168501	26.94	24.695	25.92	27.855	18.76	24.3075	0.161264															0.164883
AD 2	26.1067	24.09	25.4967	27.05	17.14	23.4442	0.157946	25.46	23.62	25.005	26.115	16.635	22.8438	0.163091	28.595	25.97	27.07	28.615	18.38	25.0087	0.083259	28.33	25.9267	27.31	28.5067	18.2233	24.9917	0.0988693	0.125791
AD 3	28.8467	26.1233	27.3233	29.9533	20.15	25.8875	0.128588	26.84	24.9167	25.9633	27.1	17.0167	23.7492	0.117373	26.605	24.42	25.68	27.91	17.565	23.8938	0.152698								0.132886
AD 4	27.51	25.675	26.59	27.81	18.03	24.5263	0.126416	27.56	25.2	25.645	27.795	17.955	24.1487	0.0939964	26.0067	24.77	25.6633	26.9633	17.04	23.6092	0.189793	25.65	24.235	25.225	26.32	16.66	23.11	0.171943	0.145537
AD 5	26.19	24.9667	25.7733	27.8	17.68	24.055	0.227667	26.005	24.17	25.19	26.67	16.7	23.1825	0.141365															0.184516
AD 6	25.86	24.08	25.93	26.3367	17.1467	23.3733	0.178418	25.92	24.105	25.705	27.87	18.17	23.9625	0.257474															0.217946
AD 7	26.3933	24.5733	25.8633	26.3033	16.7833	23.3808	0.123922	29.55	26.27	27.6			26.935	0.163232	29.1233	26.41	27.83	28.43	18.425	25.2737	0.0693681				28.33	18.5433	23.4367	1.13538e+07	2.83844e+06
AD 8	28.775	26.185	26.82	28.355	17.83	24.7975	0.0634824	28.34	26.14	27.0333	27.9667	17.65	24.6975	0.0800752															0.0717788
AD 9	28.77	26.3	27.54	30.15	20.45	26.11	0.15822	26.86	24.72	26.43	29.91	19.66	25.18	0.312083	26.7633	24.39	25.6933	26.8333	17.4	23.5792	0.11002	26.635	24.145	25.55	27.11	17.27	23.5188	0.115323	0.173911
AD 10	27.53	24.7733	26.95	28.2133	18.4167	24.5883	0.130158	25.98	24.29	26.21	27.14	17.46	23.775	0.216885															0.173521
AD 11	27.85	23.905	25.09	27.61	18.2	23.7013	0.056377	28.1833	24.1133	25.4767	27.74	18.35	23.92	0.0520725															0.0542248
AD 12	27.6733	24.6367	26.9933	28.2367	18.75	24.6542	0.12335	26.165	24.105	26.27	27.6	18.065	24.01	0.224533	29.48	26.185	28.155	29.765	19.555	25.915	0.0844944	29.6367	26.2933	28.5	30	19.6867	26.12	0.0873731	0.129938
AD 13	28.1833	25.9433	27.02	28.6633	18.92	25.1367	0.121021	28.27	25.495	26.745	28.265	18.805	24.8275	0.0919823	27.7967	25.1667	26.3733	28.0233	17.8633	24.3567	0.0921418	26.81	24.815	26.035	28.04	17.725	24.1537	0.158631	0.115944
AD 14	26.48	24.44	25.955			25.1975	0.411083	27.2767	24.5667	26.53	27.185	17.275	23.8892	0.0955566	27.715	24.6	26.31	27.61	17.49	24.0025	0.0762827				29.61	18.635	24.1225	1.8264e+07	4.566e+06
AD 15	27.0967	24.5567	26.3033	27.47	17.5533	23.9708	0.114559	26.51	23.78	25.745	27.38	17.995	23.725	0.145088	29.355	26.415	27.94	29.275	18.82	25.6125	0.0747128								0.111453
AD 16	26.71	24.8233	26.22	27.74	17.97	24.1883	0.174142	26.545	24.58	26.4	28.315	18.05	24.3362	0.216322	28.545	26.475	27.865	28.965	18.825	25.5325	0.123922	29.0133	26.5667	28.1533	29.1833	18.9667	25.7175	0.101825	0.154053
AD 17	26.3267	24.2133	26.44	26.94	17.1267	23.68	0.159689	25.115	24.13	26	27.66	18.05	23.96	0.449066	27.13	25.595	27.98	28.97	18.765	25.3275	0.286677	28.3367	26.1967	28.2533	29.03	18.8833	25.5908	0.149081	0.261128
AD 18	26.4233	23.9167	24.59	25.5167	15.69	22.4283	0.062717	25.81	24.305	24.86	27.77	17.385	23.58	0.213159	28.43	25.84	26.24	27.82	17.495	24.3488	0.0590774	28.6767	26.1467	26.5633	28.02	17.73	24.615	0.0598848	0.0987095
AD 19	26.66	24.34	26.4033	26.85	16.8533	23.6117	0.120882	27.55	24.425	26.955	28.69	18.175	24.5612	0.125979	29.23	26.03	28.165	29.005	18.455	25.4138	0.0709895	29.1467	26.2333	28.4067	29.02	18.6333	25.5733	0.0840078	0.100464
AD 20	28.605	26.375	27.665	28.785	18.645	25.3675	0.106027	28.7567	26.4367	27.7933	28.8267	18.6967	25.4383	0.100249															0.103138
*PSAD, presymptomatic Alzheimer’s disease; PDAD, prodromal Alzheimer’s disease; AD, Alzheimer’s disease

## Sheet: Table S3
Supplementary table S3. Ct values of qPCR analysis of CSF miRNAs
	miR-1273g-3p	miR-23a-3p	miR-16-5p	miR-29a-3p	miR-451a	2-dCt of miR-1273g-3p
Control 1	28.82	28.6633	27.4			0.897095
Control 2	27.4367	27.4	30.1133			0.974905
Control 3	27.6267	27.7267				1.07177
Control 4	29.3533	29.81				1.37237
Control 5	28.95	29.2367				1.21982
Control 6	28.5033	28.27				0.850667
Control 7	28.22	28.95				1.65864
Control 8	28.54	27.95	31.0233			0.664343
Control 9	28.3	28.01				0.817902
Control 10	28.74	29.4767				1.66632
Control 11	28.2633	28.8333				1.48452
Control 12	26.6267	26.5967				0.97942
Control 13	28.1233	27.6967				0.743979
PSAD 1	28.5967	29.47		29.74	32.1	1.83189
PSAD 2	28.16	29.4867		29.43	33.94	2.50822
PSAD 3	28.9567	29.9733		29.9	40	2.02324
PSAD 4	28.4733	29.8367		30.52	33.68	2.57279
PSAD 5	28.565	30.03		30.83		2.76063
PSAD 6	28.1033	29.1533		29.34	28.6	2.07053
PSAD 7	28.36	28.8567		29.22	34.14	1.41095
PSAD 8	28.6133	28.9233		30.08	34.88	1.23971
PSAD 9	27.6733	27.7867		28.72	31.94	1.08172
PSAD 10	27.9967	28.9133		29.45	27.43	1.88775
PDAD 1	28.28	28.9167	30.4933			1.55473
PDAD 2	27.97	28.52	31.36			1.46409
PDAD 3	28.1167	29.2967		30.32	31.85	2.26577
PDAD 4	27.9767	29.1833		29.77	33.07	2.30804
PDAD 5	28.57	29.46		31.01	29.05	1.85318
PDAD 6	28.35	27.7167		30.22	34.89	0.644685
PDAD 7	28.6533	28.7267		28.87	27.67	1.05214
PDAD 8	27.77	28.15	32.29			1.30134
PDAD 9	27.91	28.75		30.13	25.16	1.79005
PDAD 10	27.94	28.8033		30.03	33.22	1.81924
PDAD 11	27.56	29.04		29.8	28.85	2.78949
PDAD 12	27.7333	28.69		29.28	28.29	1.94082
PDAD 13	28.4133	28.93		29.68	29.7	1.43065
AD 1	28.05	28.7267	30.83			1.59844
AD 2	27.7733	28.57	31.34			1.73708
AD 3	28.9933	29.47		30.18	32.77	1.39152
AD 4	28.32	29.0567		30.24	28.67	1.66632
AD 5	28.69	29.0633		30.2	31.61	1.29534
AD 6	28.5333	29.2533		30.08	28.59	1.64718
AD 7	27.87	28.6633		29.88	31.16	1.73307
AD 8	28.1933	27.6967	30.8933			0.708742
AD 9	30.41	29.34	31.9933			0.476319
AD 10	28.9267	30.1033		30.44	26.69	2.26054
AD 11	27.9433	29.0233		29.96		2.11404
AD 12	28.43	29.2333		30.08	34.71	1.74513
AD 13	28.0867	29.4133		30.11	32.33	2.50822
AD 14	27.1233	27.7367		29.01	30.21	1.52979
average Ct	28.2718	28.8117	30.7737	29.884	31.2571
*PSAD, presymptomatic Alzheimer’s disease; PDAD, prodromal Alzheimer’s disease; AD, Alzheimer’s disease

## Sheet: Table S4
			Qunatitative real-time PCR
			BACE1	Forward	5’-GGC TGG CCT ATG CTG AGA TT -3’
				Reverse	5’-CTT GGG CAA ACG AAG GTT GG-3’
			GLRX5	Forward	5’-AGC TCC GAC AAG GCA TTA AA-3’
				Reverse	5’-TCA TCT AAA AGG GCG GAG TG-3’
			MTCH1	Forward	5’-CCC TGC ATG TCA TCT CAA TG-3’
				Reverse	5’-TAC AGC CCC ACA AGA AAA CC-3’
			VDAC2	Forward	5’-CAG TGC CAA ATC AAA GCT GA-3’
				Reverse	5’-TTG CAG AAA TGG AAG CAG TG-3’
			TIMM13	Forward	5’-GGC TCA TAA TGG AGC AGG TG-3’
				Reverse	5’-GAG TTG TAG GCG CGA GAC AC-3’
			Bcl2	Forward	5′-ATG TGT GTG GAG AGC GTC AA-3′
				Reverse	5′-CAG GAG AAA TCA AAC AGA GGC-3′
			Bax	Forward	5’-TTT GCT TCA GGG TTT CAT CC-3’
				Reverse	5’-CAG TTG AAG TTG CCG TCA AC-3’
			Bak	Forward	5’-TTT TCC GCA GCT ACG TTT TT-3’
				Reverse	5’-GGT GGC AAT CTT GGT GAA GT-3’
			GAPDH	Forward	5’-CGT CTT CAC CAC CAT GGA GA-3’
				Reverse	5’-CGG CCA TCA CGC CAC AGT TT-3’
			Cloning
			GLRX5 3’UTR	Forward	5’- CTC AGA TCT CGA GCT CAT TGA GGG CGG CCA AGT CCT-3’
				Reverse	5’- CCC GGG CCC GCG GTA CCG CAA TTC TTG TGG CAA ATT TAA TAG AAG AAT ATG AGA C-3’
			MTCH1 3’UTR	Forward	5’-CTC AGA TCT CGA TGA CCT GAA TCA TCT AAA AAA CAC GGT CTC AAC-3’
				Reverse	5’-CCC GGG CCC GCG GTA CCT CCA AAT CAC CAA TAC ATT TAT TTG CGG GAG-3’
			VDAC2 3’UTR	Forward	5’-CTC AGA TCT CGA GCT CAT TGA TCC AGC TGA AAG AAA CCT TTG GG-3’
				Reverse	5’-CCC GGG CCC GCG GTA CCT TAT GTA TAC TTG TTT TAT TCA TAA TTT GTC ATG TTC TGG GAT ACC-3’
			TIMM13 3’UTR	Forward	5’-ATT CTG CAG TCG ACG GTA CCT AAC CGG CGA GCG CGG-3’
				Reverse	5’-TAG ATC CGG TGG ATC CCC TTT TTG GCT CTG GAG GAA TTT CC-3’
			TIMM13 CDS	Forward	5’-GGA GAC CCA AGC TTG GTA CCA TGG AGG GCG GCT TCG
				Reverse	5’-CGT TAC TAG TGG ATC CTC ACA TGT TGG CTC GTT CCC G-3’
